# Supplementary material for: Bioaerosols as Evidence of Atmospheric Circulation Anomalies over the Okhotsk Sea and Shantar Islands in the Late Glacial–Holocene
Source: MDPI journal article supplement (doi:10.3390/cli10020024), 2022-02-09
Supplement: s1 [file s1]

**Table S1.** List of marine diatom species from peat bog of Bolshoy Shantar Island.

| Depth<br>(cm)/age<br>(cal yr BP) | Oceanic                                              | Neritic                                                                                                                                                                                                                                                              | Sublittoral<br>marine                                                                  | Sublittoral<br>brackish-<br>marine                                                                                                                   | Sublittoral<br>brackish-<br>water                                                                                                                                                                                                               | Sublittoral<br>brackish-<br>freshwater                                                                                                      |
|----------------------------------|------------------------------------------------------|----------------------------------------------------------------------------------------------------------------------------------------------------------------------------------------------------------------------------------------------------------------------|----------------------------------------------------------------------------------------|------------------------------------------------------------------------------------------------------------------------------------------------------|-------------------------------------------------------------------------------------------------------------------------------------------------------------------------------------------------------------------------------------------------|---------------------------------------------------------------------------------------------------------------------------------------------|
| 0–5/<70                          |                                                      | <i>Thalassiosira</i><br><i>gravida</i>                                                                                                                                                                                                                               |                                                                                        |                                                                                                                                                      |                                                                                                                                                                                                                                                 |                                                                                                                                             |
| 30–35/<br>430–360                |                                                      |                                                                                                                                                                                                                                                                      |                                                                                        |                                                                                                                                                      | <i>Cocconeis</i><br><i>californica</i>                                                                                                                                                                                                          |                                                                                                                                             |
| 45–60/<br>820–570                | <i>Coscinodiscus</i> sp.,<br><i>C. asteromphalus</i> | <i>Thalassionema</i><br><i>nitzschioides</i>                                                                                                                                                                                                                         |                                                                                        | <i>Navicula directa</i>                                                                                                                              | <i>Cocconeis costata</i> ,<br><i>C. scutellum</i>                                                                                                                                                                                               |                                                                                                                                             |
| 80–90/<br>1570–1320              | <i>Coscinodiscus</i> sp.                             | <i>Thalassionema</i><br><i>nitzschioides</i> ,<br><i>Thalassiosira</i><br>sp.                                                                                                                                                                                        |                                                                                        |                                                                                                                                                      |                                                                                                                                                                                                                                                 |                                                                                                                                             |
| 100–130/<br>2570–1820            | <i>Coscinodiscus</i> sp.                             | <i>Paralia</i><br><i>sulcata</i> ,<br><i>Stephanopyxis</i><br>sp.,<br><i>Thalassionema</i><br><i>nitzschioides</i> ,<br><i>Thalassiosira</i><br>sp.                                                                                                                  | <i>Amphora</i><br><i>proteus</i> ,<br><i>Navicula</i><br><i>distans</i>                | <i>Diploneis</i><br><i>interrupta</i> ,<br><i>Melosira</i><br><i>lineata</i>                                                                         | <i>Cocconeis costata</i> ,<br><i>C. californica</i> ,<br><i>C. infirmata</i> ,<br><i>C. scutellum</i> ,<br><i>C. aff. pellucida</i> ,<br><i>C. stauroneiformis</i> ,<br><i>Cyclotella striata</i> ,<br><i>Halamphora</i><br><i>coffeiformis</i> | <i>Tabularia</i><br><i>tabulata</i> ,<br><i>Thalassiosira</i><br><i>bramaputrae</i> <sup>1</sup>                                            |
| 130–145/<br>2960–2570            |                                                      | <i>Thalassiosira</i><br>sp.                                                                                                                                                                                                                                          |                                                                                        |                                                                                                                                                      |                                                                                                                                                                                                                                                 |                                                                                                                                             |
| 180–195/<br>4275–3880            | <i>Coscinodiscus</i> sp.                             | <i>Thalassiosira</i><br>sp.                                                                                                                                                                                                                                          |                                                                                        | <i>Diploneis</i><br><i>smithii</i>                                                                                                                   | <i>Cocconeis costata</i> ,<br><i>C. scutellum</i> ,<br><i>Grammatophora</i><br>sp., <i>Pinnunavis</i><br><i>yarrensis</i> ,<br><i>Tryblionella</i><br><i>levidensis</i>                                                                         | <i>Tabularia</i><br><i>tabulata</i>                                                                                                         |
| 210–215/<br>4800–4670            |                                                      | <i>Paralia sulcata</i>                                                                                                                                                                                                                                               |                                                                                        |                                                                                                                                                      |                                                                                                                                                                                                                                                 |                                                                                                                                             |
| 240–245/<br>5870–5690            |                                                      |                                                                                                                                                                                                                                                                      |                                                                                        |                                                                                                                                                      | <i>Hyalodiscus</i><br><i>sphaerophorus</i>                                                                                                                                                                                                      |                                                                                                                                             |
| 260–290/<br>7610–6440            | <i>Coscinodiscus</i> sp.                             | <i>Actinocyclus</i><br><i>curvatulus</i> ,<br><i>Paralia</i><br><i>sulcata</i> ,<br><i>Eupyxidicula</i><br><i>zabelinae</i> ,<br><i>Thalassionema</i><br><i>nitzschioides</i> ,<br><i>Thalassiosira</i><br><i>gravida</i> ,<br><i>T. lineata</i> ,<br><i>Th. sp.</i> | <i>Achnanthes</i><br><i>brevipes</i> ,<br><i>A. brevipes</i><br>var. <i>intermedia</i> | <i>Actinocyclus</i><br><i>octonarius</i> <sup>2</sup> ,<br><i>Melosira</i><br><i>lineata</i> ,<br><i>M. moniliformis</i> ,<br><i>Nitzschia sigma</i> | <i>Cocconeis</i><br><i>scutellum</i> ,<br><i>Halamphora</i><br><i>coffeiformis</i> ,<br><i>Hyalodiscus</i><br><i>scoticus</i> ,<br><i>Pinnunavis</i><br><i>yarrensis</i> ,<br><i>Tryblionella</i><br><i>levidensis</i>                          | <i>Ctenophora</i><br><i>pulchella</i> ,<br><i>Tabularia</i><br><i>tabulata</i> ,<br><i>Thalassiosira</i><br><i>bramaputrae</i> <sup>1</sup> |
| 290–310/<br>8410–7610            |                                                      | <i>Actinocyclus</i><br>sp., <i>Paralia</i><br><i>sulcata</i> var.<br><i>biseriata</i> ,<br><i>Thalassiosira</i><br>sp.                                                                                                                                               | <i>Navicula</i><br><i>distans</i>                                                      |                                                                                                                                                      | <i>Cocconeis</i><br><i>scutellum</i>                                                                                                                                                                                                            | <i>Thalassiosira</i><br><i>bramaputrae</i> <sup>1</sup>                                                                                     |
| 310–320/<br>8810–8410            |                                                      | <i>Actinocyclus</i><br><i>ingens</i> , <i>Paralia</i><br><i>sulcata</i> var.<br><i>biseriata</i> ,<br><i>Porosira</i><br><i>glacialis</i> ,<br><i>Thalassionema</i>                                                                                                  |                                                                                        | <i>Melosira</i><br><i>moniliformis</i>                                                                                                               | <i>Cocconeis</i><br><i>scutellum</i>                                                                                                                                                                                                            | <i>Ctenophora</i><br><i>pulchella</i> ,<br><i>Tabularia</i><br><i>tabulata</i>                                                              |

---

|                         |                                                        |                                                                                                                                                                   |                                                                                                      |                                                                                                   |                                                                                                                            |
|-------------------------|--------------------------------------------------------|-------------------------------------------------------------------------------------------------------------------------------------------------------------------|------------------------------------------------------------------------------------------------------|---------------------------------------------------------------------------------------------------|----------------------------------------------------------------------------------------------------------------------------|
|                         |                                                        | <i>nitzschioides</i> ,<br><i>Thalassiosira</i><br>sp.                                                                                                             |                                                                                                      |                                                                                                   |                                                                                                                            |
| 320–330/<br>9200–8810   |                                                        | <i>Actinocyclus</i><br><i>ochotensis</i> , <i>A.</i><br><i>ochotensis</i> var.<br><i>fossilis</i> ,<br><i>Thalassiosira</i><br><i>insigna</i> ,<br><i>Th.</i> sp. |                                                                                                      | <i>Actinocyclus</i><br><i>octonarius</i> <sup>2</sup> ,<br><i>Melosira</i><br><i>moniliformis</i> | <i>Cocconeis</i><br><i>scutellum</i><br><br><i>Ctenophora</i><br><i>pulchella</i> ,<br><i>Tabularia</i><br><i>tabulata</i> |
| 350–360/<br>11060–10350 |                                                        | <i>Thalassiosira</i><br>sp.                                                                                                                                       | <i>Trigonium</i><br><i>arcticum</i>                                                                  | <i>Actinocyclus</i><br><i>octonarius</i> <sup>2</sup> ,<br><i>Nitzschia sigma</i>                 | <i>Cocconeis</i><br><i>scutellum</i><br><br><i>Tabularia</i><br><i>tabulata</i>                                            |
| 365–370/<br>11770–11410 | <i>Coscinodiscus</i> sp.,<br><i>Thalassiothrix</i> sp. | <i>Thalassionema</i><br><i>nitzschioides</i> ,<br><i>Paralia sulcata</i><br>var. <i>biseriata</i>                                                                 | <i>Fallacia</i><br><i>dithmarsica</i> ,<br><i>Pseudogomphone</i><br><i>ma</i><br><i>kamtchaticum</i> | <i>Actinocyclus</i><br><i>octonarius</i> <sup>2</sup> ,<br><i>Melosira</i><br><i>moniliformis</i> | <i>Cocconeis</i><br><i>scutellum</i><br><br><i>Ctenophora</i><br><i>pulchella</i> ,<br><i>Tabularia</i><br><i>tabulata</i> |

---

<sup>1</sup> sublittoral, planktonic; <sup>2</sup> sublittoral, planktonic-benthic.
